# Supplementary material
Source: Springer Nature journal article supplement (https://www.springermedizin.de/resource/supplementary/12885_2011_2926_MOESM1_ESM.pdf/9462300)

(A) 135 mg/m<sup>2</sup>

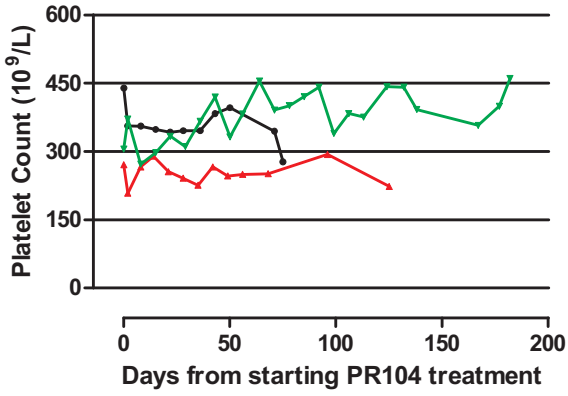

(B) 270 mg/m<sup>2</sup>

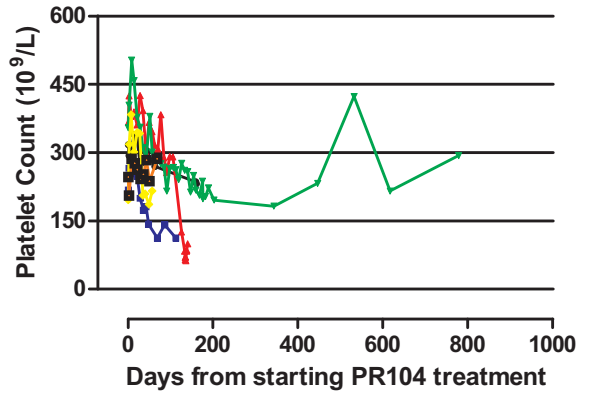

(C) 540 mg/m<sup>2</sup>

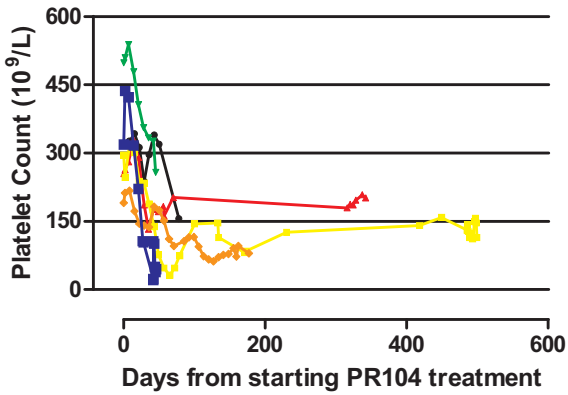

(D) 675 mg/m<sup>2</sup>

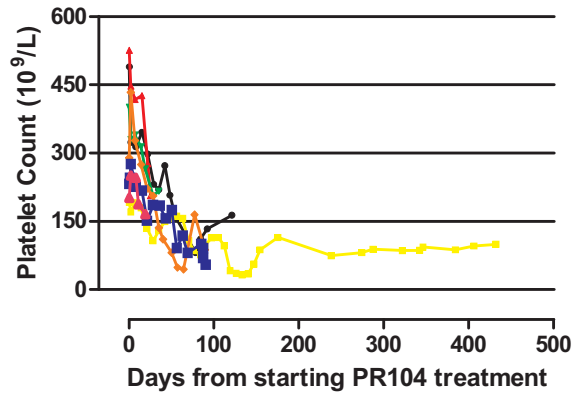

(E) 900 mg/m<sup>2</sup>

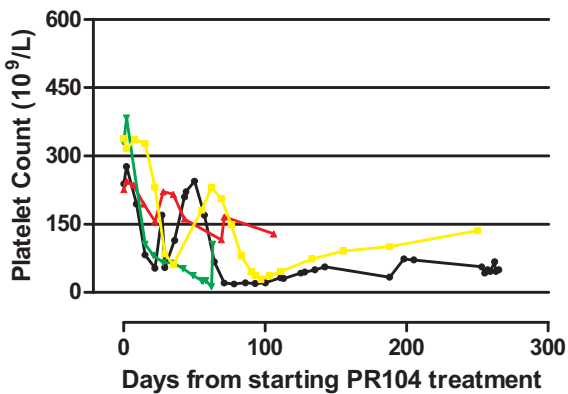

(F) Platelet Nadir vs PR104 dose-level

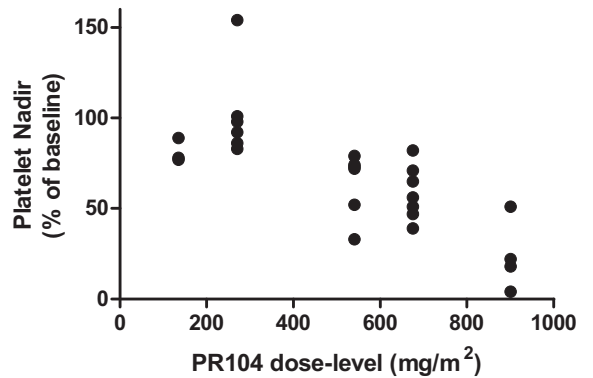

Supplement: MOESM1 [file 9462300]
